# Supplementary material
Source: PubMed Central journal article supplement (PMC7946813)

**Source data for Figure 6:**

Unprocessed western blots with images of the data shown in Figure 6.

Protein ladder is Thermo 26616. Left panels represent lanes 1-12 in Figure 6.

Right panels represent lanes 13-16 in Figure 6.

SMC1 and CTCF: 3-8% Tris-Acetate gels

Histone H3: 4-12 % Bis-Tris gels

**Probe for SMC1**

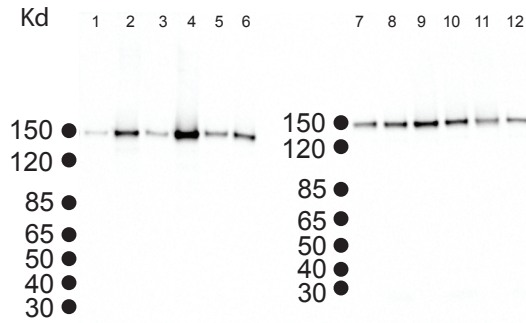

**Probe for SMC1**

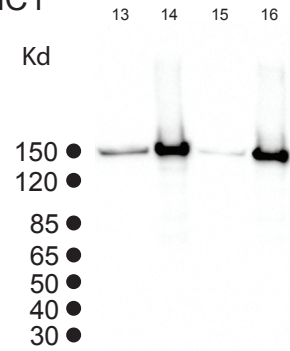

**Probe for CTCF**

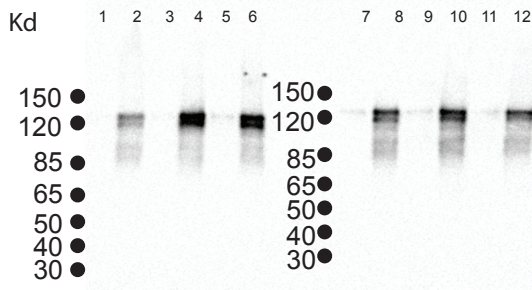

**Probe for CTCF**

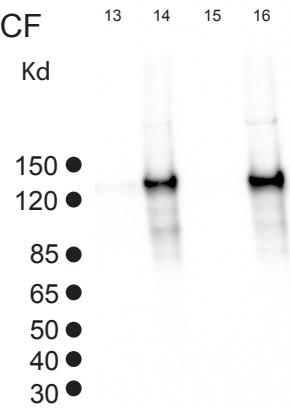

**Probe for Histone 3**

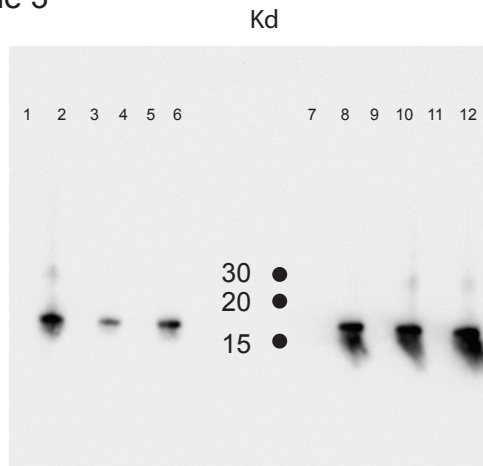

**Probe for Histone 3**

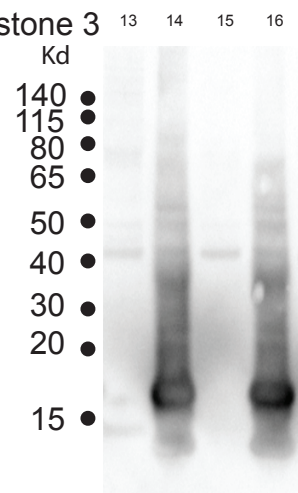

Supplement: NIHMS1662475-supplement-1662475_SourceData_Fig6.pdf [file NIHMS1662475-supplement-1662475_SourceData_Fig6.pdf]
